# Supplementary material
Source: PubMed Central journal article supplement (PMC8908852)
Supplement: mmc1.pdf [file mmc1.pdf]

# **Past COVID-19 and immunosuppressive regimens affect the long-term response to anti-SARS-CoV-2 vaccination in liver transplant recipients**

Pierluigi Toniutto, Edmondo Falletti, Sara Cmet, Annarosa Cussigh, Laura Veneto, Davide Bitetto, Ezio Fornasiere, Elisa Fumolo, Carlo Fabris, Assunta Sartor, Roberto Peressutti, Francesco Curcio, Laura Regattin, Lucrezia Grillone

## Table of contents

|               |    |
|---------------|----|
| Table S1..... | 2  |
| Table S2..... | 5  |
| Table S3..... | 8  |
| Table S4..... | 10 |
| Table S5..... | 12 |
| Table S6..... | 15 |
| Table S7..... | 18 |

**Table S1.** Association between prevaccination demographic and clinical characteristics of COVID-19 naïve liver transplanted patients (N=131) with regards to the development of a positive ( $\geq 0.8$  U/ml) or negative ( $< 0.8$  U/ml) anti-SARS-CoV-2 s-RBD antibody response, as assessed one month ( $31 \pm 2$  days) after the second dose of the Pfizer® BTN162b2 vaccine. Categorical parameters are presented as frequencies (%), and the Pearson chi-squared test was used for statistical comparisons. Continuous variables are presented as medians (interquartile range), for serum immunosuppressive drug serum levels, they are presented as the means ( $\pm$ SE), and the rank-sum test (Mann–Whitney) was used for statistical comparisons. Stepwise regression with a forward approach was used to discriminate independent predictive variables to achieve a positive antibody response after vaccination in a multivariate logistic model analysis.

|                                    | Univariate analysis                            |                                                   |       | Multivariate analysis |          |   |
|------------------------------------|------------------------------------------------|---------------------------------------------------|-------|-----------------------|----------|---|
|                                    | Anti-s RBD IgG negative<br>(N = 44)            | Anti-s RBD IgG positive<br>(N = 87)               | p     | O.R.                  | 95% C.I. | p |
| Age at LT (years)                  | 60.5 (56.9-65.7)                               | 57.1 (50.4-61.5)                                  | 0.005 |                       |          |   |
| Male gender                        | 28 (63.6)                                      | 64 (73.6)                                         | 0.241 |                       |          |   |
| BMI (kg/m <sup>2</sup> )           | 26.3 (24.2-29.3)                               | 25.5 (23.2-28.5)                                  | 0.485 |                       |          |   |
| Months between LT and vaccination  | 73.3 (19.6-145)                                | 126 (59.1-195)                                    | 0.017 |                       |          |   |
| Etiology (HCV, HBV, AH, AI, other) | 9, 8, 19, 4, 4<br>(20.5, 18.2, 43.2, 9.1, 9.1) | 19, 13, 39, 9, 7<br>(21.8, 14.9, 44.8, 10.3, 8.0) | 0.989 |                       |          |   |
| HCC                                | 17 (38.6)                                      | 30 (4.5)                                          | 0.640 |                       |          |   |
| DM                                 | 17 (38.6)                                      | 29 (33.3)                                         | 0.548 |                       |          |   |
| Dyslipidemia                       | 13 (29.6)                                      | 16 (18.4)                                         | 0.146 |                       |          |   |

|                                      |                           |                           |        |       |             |        |
|--------------------------------------|---------------------------|---------------------------|--------|-------|-------------|--------|
| Alcohol consumption >40 gr/day       | 5 (11.4)                  | 4 (4.6)                   | 0.148  |       |             |        |
| HTN                                  | 22 (50.0)                 | 36 (41.4)                 | 0.348  |       |             |        |
| Presence of esophageal varices       | 2 (4.6)                   | 4 (4.6)                   | 0.989  |       |             |        |
| Presence of ascites                  | 3 (6.8)                   | 1 (1.6)                   | 0.075  |       |             |        |
| IS single drug frequency             |                           |                           |        |       |             |        |
| Tacrolimus                           | 26 (59.1)                 | 59 (67.8)                 | 0.323  |       |             |        |
| Cyclosporine                         | 10 (22.7)                 | 21 (24.1)                 | 0.858  |       |             |        |
| MMF                                  | 40 (90.9)                 | 18 (21.7)                 | <0.001 |       |             |        |
| Everolimus                           | 2 (4.6)                   | 10 (11.5)                 | 0.193  |       |             |        |
| Prednisone                           | 6 (13.6)                  | 7 (8.1)                   | 0.312  |       |             |        |
| Double-triple IS including MMF       | 34 (77.3)                 | 17 (19.5)                 | <0.001 |       |             |        |
| (MMF+T; +C; +E; +P; +C+P)            | 22, 8, 1, 1, 2            | 8, 8, 1, 0, 0             |        |       |             |        |
|                                      | (50, 18.2, 2.3, 2.3, 4.5) | (9.2, 9.2, 1.1, 0, 0)     |        |       |             |        |
| Double-triple IS excluding MMF       | 3 (6.8)                   | 11 (12.6)                 | 0.308  |       |             |        |
| (T+E, T+A, T+P, C+P, T+E+P)          | 0, 0, 2, 0, 1             | 3, 1, 5, 1, 1             |        |       |             |        |
|                                      | (0, 0, 4.5, 0, 2.3)       | (3.4, 1.1, 5.7, 1.1, 1.1) |        |       |             |        |
| Any double IS therapy                | 34 (77.3)                 | 27 (31.0)                 | <0.001 |       |             |        |
| Any triple IS therapy                | 3 (3.9)                   | 1 (0.0)                   | 0.075  | <0.01 | <0.01-0.073 | <0.001 |
| Serum IS drug levels or daily dose # |                           |                           |        |       |             |        |
| Tacrolimus (ng/ml)                   | 3.36 ±3.54                | 4.50 ±8.38                | 0.635  |       |             |        |
| Cyclosporine (ng/ml)                 | 8.25 ±16.6                | 13.6 ±28.7                | 0.618  |       |             |        |
| MMF (g/day)                          | 1.59 ±0.68                | 0.30 ±0.62                | <0.001 | 0.091 | 0.036-0.228 | <0.001 |
| Everolimus (ng/ml)                   | 0.23 ±1.05                | 0.53 ±1.78                | 0.312  |       |             |        |

|                                       |                  |                  |        |       |             |       |
|---------------------------------------|------------------|------------------|--------|-------|-------------|-------|
| Prednisone (mg/day)                   | 0.62 ±1.71       | 0.46 ±1.73)      | 0.421  |       |             |       |
| IS levels with respect to reference # |                  |                  |        |       |             |       |
| Below                                 | 20 (45.5)        | 43 (49.4)        | 0.667  |       |             |       |
| Above                                 | 1 (2.3)          | 5 (5.8)          | 0.369  |       |             |       |
| Hemoglobin (g/dl)                     | 13.0 (11.7-14.3) | 13.6 (12.6-15.0) | 0.017  |       |             |       |
| Leukocytes (n/μl)                     | 4630 (4055-6105) | 5980 (4860-7120) | <0.001 | 1.001 | 1.000-1.001 | 0.005 |
| Neutrophils (n/μl)                    | 3070 (2430-3820) | 3540 (2860-4310) | 0.016  |       |             |       |
| Albumin (g/dl)                        | 4.30 (3.95-4.60) | 4.24 (4.10-4.42) | 0.607  |       |             |       |
| Bilirubin (mg/dl)                     | 0.57 (0.39-0.77) | 0.66 (0.43-1.00) | 0.165  |       |             |       |
| eGFR (ml/min/1.73m <sup>2</sup> )     | 53.1 (45.6-70.3) | 65.1 (46.5-79.6) | 0.123  |       |             |       |
| AST (IU/l)                            | 15.5 (13-22)     | 20 (16-25)       | 0.005  |       |             |       |
| ALT (IU/l)                            | 14 (9-22)        | 17 (12-24)       | 0.053  |       |             |       |
| INR                                   | 1.02 (0.96-1.12) | 1.05 (1.00-1.16) | 0.093  |       |             |       |
| 25-OH-Vitamin D (ng/ml)               | 31.2 (27.7-34.0) | 30.9 (25.0-35.0) | 0.642  |       |             |       |

LT: liver transplantation; BMI: body mass index; HBV: hepatitis B virus; HCV: hepatitis C virus, AH: alcoholic; AI: autoimmune; HCC: hepatocellular carcinoma; DM: diabetes mellitus; HTN: arterial hypertension; MMF: mycophenolate mofetil; IS: immunosuppressive; T: tacrolimus, C: cyclosporine, E: everolimus, A: azathioprine, P: prednisone; #reference blood levels evaluated within 1 month before vaccination for each IS drug were calculated in accordance with Cillo et al.<sup>35</sup> ; eGFR: estimated glomerular filtration rate; AST: aspartate aminotransferase; ALT: alanine aminotransferase; INR international normalized ratio. Logistic model estimation parameters: pseudo R<sup>2</sup> = 0.525; area under the ROC curve = 0.935; correct classification = 88.6%.

**Table S2.** Association between prevaccination demographic and clinical characteristics of COVID-19 naïve liver transplanted patients (N=126) with regards to the development of a positive ( $\geq 0.8$  U/ml) or negative ( $< 0.8$  U/ml) anti-SARS-CoV-2 s-RBD antibody response, as assessed 4 months ( $125 \pm 5$  days) after the second dose of the Pfizer® BTN162b2 vaccine. Categorical parameters are presented as frequencies (%), and the Pearson chi-squared test was used for statistical comparisons. Continuous variables are presented as medians (interquartile range), for serum immunosuppressive drug levels, they are presented as the means ( $\pm$ SE), and the rank-sum test (Mann–Whitney) was used for statistical comparisons. Stepwise regression with a forward approach was used to discriminate independent predictive variables to achieve a positive antibody response after vaccination in a multivariate logistic model analysis.

|                                    | Univariate analysis                              |                                                    |       | Multivariate analysis |             |       |
|------------------------------------|--------------------------------------------------|----------------------------------------------------|-------|-----------------------|-------------|-------|
|                                    | Anti-s RBD IgG negative<br>(N = 29)              | Anti-s RBD IgG positive<br>(N = 97)                | p     | O.R.                  | 95% C.I.    | p     |
| Age at LT (years)                  | 60.8 (58.2-65.8)                                 | 57.4 (51.1-61.8)                                   | 0.003 | 0.923                 | 0.865-0.992 | 0.030 |
| Male gender                        | 19 (65.5)                                        | 69 (71.1)                                          | 0.563 |                       |             |       |
| BMI (kg/m <sup>2</sup> )           | 26.4 (24.5-28.7)                                 | 25.5 (23.4-28.7)                                   | 0.551 |                       |             |       |
| Months between LT and vaccination  | 60.0 (19.1-98.4)                                 | 117 (59.1-189)                                     | 0.011 |                       |             |       |
| Etiology (HCV, HBV, AH, AI, other) | 6, 6, 11, 3, 3<br>(20.7, 20.7, 37.9, 10.3, 10.3) | 21, 15, 45, 10, 6<br>(21.6, 15.5, 46.4, 10.3, 6.2) | 0.865 |                       |             |       |
| HCC                                | 10 (34.5)                                        | 37 (38.1)                                          | 0.721 |                       |             |       |
| DM                                 | 9 (31.0)                                         | 33 (34.0)                                          | 0.765 |                       |             |       |
| Dyslipidemia                       | 8 (27.6)                                         | 20 (20.6)                                          | 0.428 |                       |             |       |

|                                    |                             |                           |        |       |             |        |
|------------------------------------|-----------------------------|---------------------------|--------|-------|-------------|--------|
| Alcohol consumption >40 gr/day     | 3 (10.3)                    | 7 (7.2)                   | 0.584  |       |             |        |
| HTN                                | 13 (44.8)                   | 41 (42.3)                 | 0.807  |       |             |        |
| Presence of esophageal varices     | 2 (6.9)                     | 4 (4.1)                   | 0.538  |       |             |        |
| Presence of ascites                | 2 (6.9)                     | 2 (2.1)                   | 0.193  |       |             |        |
| Immunosuppressive treatment        |                             |                           |        |       |             |        |
| Tacrolimus                         | 20 (69.0)                   | 62 (63.9)                 | 0.617  |       |             |        |
| Cyclosporine                       | 5 (17.1)                    | 24 (24.7)                 | 0.400  |       |             |        |
| MMF                                | 25 (86.2)                   | 30 (30.9)                 | <0.001 |       |             |        |
| Everolimus                         | 2 (6.9)                     | 9 (9.3)                   | 0.690  |       |             |        |
| Prednisone                         | 5 (17.2)                    | 7 (7.2)                   | 0.249  |       |             |        |
| Double-triple IS including MMF     | 23 (79.3)                   | 25 (25.8)                 | <0.001 |       |             |        |
| (MMF+T; +C; +E; +P; +C+P)          | 16, 4, 1, 1, 1              | 13, 10, 1, 0, 1           |        |       |             |        |
|                                    | (55.2, 13.8, 3.4, 3.4, 3.4) | (13.4, 10.3, 1, 0, 1)     |        |       |             |        |
| Double-triple IS excluding MMF     | 3 (10.3)                    | 9 (9.3)                   | 0.864  |       |             |        |
| (T+E, T+A, T+P, C+P, T+E+P)        | 0, 0, 2, 0, 1               | 2, 1, 4, 1, 1             |        |       |             |        |
|                                    | (0.0, 0.0, 6.9, 0.0, 3.4)   | (2.1, 1.0, 4.1, 1.0, 1.0) |        |       |             |        |
| Any double IS therapy              | 24 (82.8)                   | 32 (33.0)                 | <0.001 |       |             |        |
| Any triple IS therapy              | 2 (6.9)                     | 2 (2.1)                   | 0.193  |       |             |        |
| Serum IS drug levels or daily dose |                             |                           |        |       |             |        |
| Tacrolimus (ng/ml)                 | 3.86 ±0.61                  | 3.58 ±0.36                | 0.451  |       |             |        |
| Cyclosporine (ng/ml)               | 4.75 ±2.11                  | 13.8 ±2.89                | 0.240  |       |             |        |
| MMF (g/d)                          | 1.57 ±0.14                  | 0.49 ±0.08                | <0.001 | 0.265 | 0.134-0.525 | <0.001 |
| Everolimus (ng/ml)                 | 0.34 ±0.24                  | 0.43 ±0.17                | 0.922  |       |             |        |

|                                                  |                  |                  |        |       |             |       |
|--------------------------------------------------|------------------|------------------|--------|-------|-------------|-------|
| Prednisone (mg/d)                                | 0.80 ±0.35       | 0.36 ±0.14       | 0.115  |       |             |       |
| IS levels with respect to reference <sup>#</sup> |                  |                  |        |       |             |       |
| below                                            | 15 (51.7)        | 43 (44.3)        | 0.483  |       |             |       |
| above                                            | 1 (3.5)          | 4 (4.1)          | 0.870  |       |             |       |
| Hemoglobin (g/dl)                                | 12.8 (11.6-13.6) | 13.6 (12.8-15.0) | 0.005  |       |             |       |
| Leukocytes (n/μl)                                | 4520 (4010-5550) | 5980 (4700-6750) | <0.001 | 1.001 | 1.000-1.001 | 0.012 |
| Neutrophils (n/μl)                               | 3900 (2350-3770) | 3480 (2840-4310) | 0.029  |       |             |       |
| Albumin (g/dl)                                   | 4.50 (4.07-4.60) | 4.24 (4.10-4.41) | 0.204  |       |             |       |
| Bilirubin (mg/dl)                                | 0.53 (0.37-0.63) | 0.64 (0.47-0.97) | 0.022  |       |             |       |
| eGFR (ml/min/1.73 m <sup>2</sup> )               | 57.9 (45.9-70.0) | 65.1 (48.1-80.1) | 0.112  |       |             |       |
| AST (IU/l)                                       | 15 (13-21)       | 19 (16-25)       | 0.003  |       |             |       |
| ALT (IU/l)                                       | 12 (9-17)        | 18 (12-27)       | 0.001  |       |             |       |
| INR                                              | 1.03 (0.96-1.14) | 1.21 (0.98-2.05) | 0.548  |       |             |       |
| 25-OH-Vitamin D (ng/ml)                          | 32.3 (28.6-34.0) | 30.9 (25.0-35.0) | 0.268  |       |             |       |

---

LT: liver transplantation; BMI: body mass index; HBV: hepatitis B virus; HCV: hepatitis C virus; AH: alcoholic hepatitis; AI: autoimmune; HCC: hepatocellular carcinoma; DM: diabetes mellitus; HTN: arterial hypertension; MMF: mycophenolate mofetil; IS: immunosuppressive; T: tacrolimus; C: cyclosporine; E: everolimus; A: azathioprine; P: prednisone; <sup>#</sup>reference blood levels evaluated within 1 month before vaccination for each IS drug were calculated in accordance with Cillo et al.<sup>35</sup>; eGFR: estimated glomerular filtration rate; AST: aspartate aminotransferase; ALT: alanine aminotransferase; INR international normalized ratio. Logistic model estimation parameters: pseudo R<sup>2</sup> = 0.434; area under the ROC curve = 0.910; correct classification = 88.9%.

**Table S3.** Impact of each single or in combination immunosuppressive drug in influencing the anti-SARS-CoV-2 s-RBD antibody response, assessed at every time point after Pfizer® BTN162b2 vaccine in COVID-19 naïve liver transplanted patients. At the top are presented single and in combination immunosuppressive drugs. In the left column are presented, starting from the top and from each time point after vaccine dose, the mean of anti-SARS-CoV-2 s-RBD antibody titer. For every time point after vaccine dose, the number of patients (N.) treated with each single or in combination immunosuppressive drug, the mean and the percentage deviation (%Dev) of anti-SARS-CoV-2 s-RBD antibody titers are displayed in the rows.

|                                                                                                                             | <b>T</b> | <b>C</b> | <b>E</b> | <b>T+A</b> | <b>T+E</b> | <b>C+P</b> | <b>T+P</b> | <b>T+E+P</b> | <b>M</b> | <b>M+T</b> | <b>M+C</b> | <b>M+E</b> | <b>M+P</b> | <b>M+C+P</b> |
|-----------------------------------------------------------------------------------------------------------------------------|----------|----------|----------|------------|------------|------------|------------|--------------|----------|------------|------------|------------|------------|--------------|
| Three weeks (19 days) after the 1 <sup>st</sup> vaccine dose (mean antiSARS-CoV-2 s-RBD antibody titer: 2.03 U/ml; N=131)   |          |          |          |            |            |            |            |              |          |            |            |            |            |              |
| N.                                                                                                                          | 42       | 12       | 5        | 1          | 3          | 1          | 7          | 2            | 7        | 30         | 16         | 2          | 1          | 2            |
| Mean                                                                                                                        | 5,3      | 2,8      | 0,6      | 0,5        | 0,0        | 0,0        | 0,5        | 0,0          | 0,0      | 0,7        | 0,03       | 0,0        | 0,0        | 0,0          |
| %Dev                                                                                                                        | 162      | 39       | -71      | -75        | -100       | -100       | -75        | -100         | -100     | -68        | -98        | -100       | -100       | -100         |
| One month (31±2 days) after the 2 <sup>nd</sup> vaccine dose (mean antiSARS-CoV-2 s-RBD antibody titer: 340 U/ml; N=131)    |          |          |          |            |            |            |            |              |          |            |            |            |            |              |
| N.                                                                                                                          | 42       | 12       | 5        | 1          | 3          | 1          | 7          | 2            | 7        | 30         | 16         | 2          | 1          | 2            |
| Mean                                                                                                                        | 614      | 1087     | 253      | 228        | 91,5       | 168        | 347        | 2,5          | 0,2      | 31         | 27         | 0,7        | 0,0        | 0,0          |
| %Dev                                                                                                                        | 81       | 220      | -25      | -33        | -73        | -51        | 2          | -99          | -100     | -91        | -92        | -100       | -100       | -100         |
| Four months (125±5 days) after the 2 <sup>nd</sup> vaccine dose (mean antiSARS-CoV-2 s-RBD antibody titer: 185 U/ml, N=126) |          |          |          |            |            |            |            |              |          |            |            |            |            |              |
| N.                                                                                                                          | 42       | 12       | 5        | 1          | 2          | 1          | 6          | 2            | 7        | 29         | 14         | 2          | 1          | 2            |
| Mean                                                                                                                        | 319      | 414      | 284      | 274        | 64         | 72         | 88         | 3,9          | 27       | 50         | 66         | 12,        | 0,0        | 5,7          |
| %Dev                                                                                                                        | 72       | 124      | 54       | 48         | -65        | -61        | -52        | -98          | -85      | -73        | -65        | -93        | -100       | -97          |
| Six months (165±4 days) after the 2 <sup>nd</sup> vaccine dose (mean antiSARS-CoV-2 s-RBD antibody titer: 122 U/ml, N=123)  |          |          |          |            |            |            |            |              |          |            |            |            |            |              |



|      |     |     |     |     |     |     |     |     |     |     |     |     |      |     |
|------|-----|-----|-----|-----|-----|-----|-----|-----|-----|-----|-----|-----|------|-----|
| N.   | 42  | 11  | 5   | 1   | 3   | 1   | 6   | 2   | 6   | 27  | 14  | 2   | 1    | 2   |
| Mean | 209 | 228 | 182 | 306 | 37  | 61  | 70  | 3,2 | 38  | 42  | 40  | 37  | 0,5  | 3,7 |
| %Dev | 71  | 87  | 49  | 151 | -70 | -50 | -42 | -97 | -69 | -66 | -67 | -70 | -100 | -97 |

---

T: tacrolimus; C: cyclosporine; M: mycophenolate mofetil; E: everolimus; A: azathioprine; P: prednisone.

**Table S4.** Linear regression analysis evaluating the demographic and clinical contributors to the development of anti-SARS-CoV-2 s-RBD antibody response to Pfizer® BTN162b2 vaccine in COVID-19-naïve liver transplanted patients. Antibody titer values are considered as continuous variable, and they were assessed at each time point after vaccination. Stepwise regression with a forward approach was used to discriminate best fitting variables to predict antibody response after vaccination in a multivariate linear model analysis. All variables presented in table 2, that were significantly associated at the univariate regression test, have been selected to run in the multivariate linear model. At three weeks after the first and at 1 month after the second vaccine dose, data were available in all patients (N=131), while at 4 and 6 months after the second vaccine dose data were available in 126 and 123 patients respectively.

| Anti-SARS-CoV-2 s-RBD antibody titer values                | t      | Coef.  | 95% C.I.      | p      |
|------------------------------------------------------------|--------|--------|---------------|--------|
| <b>Three weeks (19 days) after the first vaccine dose</b>  |        |        |               |        |
| Age at transplantation (years)                             | -2.63  | -0.017 | -0.029 -0.004 | 0.009  |
| MMF daily dose (g/day)                                     | -6.10  | -0.322 | -0.427 -0.218 | <0.001 |
| eGFR (ml/min/1.73m <sup>2</sup> )                          | 2.34   | 0.007  | 0.001 0.012   | 0.021  |
| (Model R <sup>2</sup> = 0.315)                             |        |        |               |        |
| <b>One month (31±2 days) after the second vaccine dose</b> |        |        |               |        |
| Age at transplantation (years)                             | -3.84  | -0.028 | -0.042 -0.014 | <0.001 |
| MMF daily dose (g/day)                                     | -11.36 | -1.163 | -1.365 -0.960 | <0.001 |

|                                 |       |        |               |       |
|---------------------------------|-------|--------|---------------|-------|
| Alcohol consumption >40gr/day   | -2.52 | -0.646 | -1.154 -0.138 | 0.013 |
| Serum hemoglobin levels (gr/dl) | 2.52  | 0.146  | 0.031 0.260   | 0.013 |
| (Model R <sup>2</sup> = 0.568)  |       |        |               |       |

---

Four months (125±5 days) after the second vaccine dose

|                                      |       |        |               |        |
|--------------------------------------|-------|--------|---------------|--------|
| Age at liver transplantation (years) | -4.51 | -0.033 | -0.047 -0.018 | <0.001 |
| MMF daily dose (g/day)               | -7.07 | -0.799 | -1.023 -0.575 | <0.001 |
| (Model R <sup>2</sup> = 0.385)       |       |        |               |        |

---

Six months (165±4 days) after the second vaccine dose

|                                |       |        |               |        |
|--------------------------------|-------|--------|---------------|--------|
| Age at transplantation (years) | -4.00 | -0.028 | -0.043 -0.014 | <0.001 |
| MMF daily dose (g/day)         | -5.69 | -0.688 | -0.928 -0.449 | <0.001 |
| (Model R <sup>2</sup> = 0.328) |       |        |               |        |

---

MMF: mycophenolate mofetil; eGFR: estimated glomerular filtration rate.

**Table S5.** Association between prevaccination demographic and clinical characteristics of COVID-19-naïve liver transplanted patients (N=131) with regards to the development of a strong positive ( $\geq 100$  U/ml) or negative ( $< 100$  U/ml) anti-SARS-CoV-2 s-RBD antibody response, as assessed one month ( $31 \pm 2$  days) after the second dose of the Pfizer® BTN162b2 vaccine. Categorical parameters are presented as frequencies (%), and the Pearson chi-squared test was used for statistical comparisons. Continuous variables are presented as medians (interquartile range), for serum immunosuppressive drug levels, they are presented as the means ( $\pm$ SE), and the rank-sum test (Mann–Whitney) was used for statistical comparisons. Stepwise regression with a forward approach was used to discriminate independent predictive variables to achieve a strong antibody response after vaccination in a multivariate logistic model analysis.

|                                    | Univariate analysis                              |                                                   |           | Multivariate analysis |                     |           |
|------------------------------------|--------------------------------------------------|---------------------------------------------------|-----------|-----------------------|---------------------|-----------|
|                                    | Anti-s RBD IgG $< 100$ U/ml<br>(N = 80)          | Anti-s RBD IgG $\geq 100$ U/ml<br>(N = 51)        | p         | O.R.                  | 95% C.I.            | p         |
| Age at LT (years)                  | 59.8 (54.4-64.7)                                 | 55.7 (48.3-60.5)                                  | 0.002     | 0.941                 | 0.898-0.987         | 0.013     |
| Male gender                        | 58 (72.5)                                        | 34 (66.7)                                         | 0.476     |                       |                     |           |
| BMI (kg/m <sup>2</sup> )           | 25.5 (23.6-29.1)                                 | 26.2 (23.4-28.5)                                  | 0.878     |                       |                     |           |
| Months between LT and vaccination  | 77.3 (25.9-169.9)                                | 153.9 (72.4-200.8)                                | 0.001     |                       |                     |           |
| Etiology (HCV, HBV, AH, AI, other) | 16, 15, 40, 5, 4<br>(20.0, 18.8, 50.0, 6.3, 5.0) | 12, 6, 18, 8, 7<br>(23.5, 11.8, 35.3, 15.7, 13.7) | 0.082     |                       |                     |           |
| HCC                                | 32 (40.0)                                        | 15 (29.4)                                         | 0.218     |                       |                     |           |
| DM                                 | 32 (40.0)                                        | 14 (27.5)                                         | 0.142     |                       |                     |           |
| Dyslipidemia                       | 20 (25.0)                                        | 9 (17.7)                                          | 0.323     |                       |                     |           |
| Alcohol consumption $> 40$ gr/day  | 9 (11.3)                                         | 0 (0.0)                                           | $< 0.001$ | $< 0.01$              | $< 0.01$ - $< 0.01$ | $< 0.001$ |

|                                                  |                                                |                                      |        |       |             |        |
|--------------------------------------------------|------------------------------------------------|--------------------------------------|--------|-------|-------------|--------|
| HTN                                              | 35 (43.8)                                      | 23 (45.1)                            | 0.880  |       |             |        |
| Presence of esophageal varices                   | 4 (5.0)                                        | 2 (3.9)                              | 0.773  |       |             |        |
| Presence of ascites                              | 3 (3.8)                                        | 1 (2.0)                              | 0.562  |       |             |        |
| IS treatment                                     |                                                |                                      |        |       |             |        |
| Tacrolimus                                       | 50 (62.5)                                      | 35 (68.3)                            | 0.474  |       |             |        |
| Cyclosporine                                     | 19 (23.8)                                      | 12 (23.5)                            | 0.977  |       |             |        |
| MMF                                              | 53 (66.3)                                      | 5 (9.8)                              | <0.001 |       |             |        |
| Everolimus                                       | 6 (7.5)                                        | 6 (11.8)                             | 0.409  |       |             |        |
| Prednisone                                       | 8 (10.0)                                       | 5 (9.8)                              | 0.971  |       |             |        |
| Double-triple IS including MMF                   | 46 (57.5)                                      | 5 (9.8)                              | <0.001 |       |             |        |
| (MMF+T; +C; +E; +P; +C+P)                        | 27, 14, 2, 1, 2<br>(33.8, 17.5, 2.5, 1.3, 2.5) | 3, 2, 0, 0, 0<br>(5.9, 3.9, 0, 0, 0) |        |       |             |        |
| Double-triple IS excluding MMF                   | 6 (7.5)                                        | 8 (15.7)                             | 0.139  |       |             |        |
| (T+E, T+A, T+P, C+P, T+E+P)                      | 1, 0, 3, 0, 2<br>(1.3, 0, 3.8, 0, 2.5)         | 2, 1, 4, 1, 0<br>(3.9, 2, 7.8, 2, 0) |        |       |             |        |
| Any double IS therapy                            | 48 (60.0)                                      | 13 (25.5)                            | <0.001 |       |             |        |
| Any triple IS therapy                            | 4 (5.0)                                        | 0 (0.0)                              | 0.105  |       |             |        |
| Serum IS drug levels or daily dose               |                                                |                                      |        |       |             |        |
| Tacrolimus (ng/ml)                               | 4.62 ±0.99                                     | 3.33 ±0.38                           | 0.728  |       |             |        |
| Cyclosporine (ng/ml)                             | 10.4 ±2.7                                      | 13.9 ±3.8                            | 0.701  |       |             |        |
| MMF (g/day)                                      | 1.11 ±0.10                                     | 0.13 ±0.06                           | <0.001 | 0.162 | 0.072-0.365 | <0.001 |
| Everolimus (ng/ml)                               | 0.34 ±0.15                                     | 0.57 ±0.27                           | 0.478  |       |             |        |
| Prednisone (mg/day)                              | 0.50 ±0.19                                     | 0.54 ±0.25                           | 0.951  |       |             |        |
| IS levels with respect to reference <sup>#</sup> |                                                |                                      |        |       |             |        |
| Below                                            | 36 (45.0)                                      | 27 (52.9)                            | 0.375  |       |             |        |

|                                    |                   |                  |       |
|------------------------------------|-------------------|------------------|-------|
| Above                              | 5 (6.3)           | 1 (2.0)          | 0.252 |
| Hemoglobin (g/dl)                  | 13.2 (12.1-14.7)  | 13.6 (12.6-15.0) | 0.089 |
| White blood cells (n/ $\mu$ l)     | 5510 (4480-6495)  | 5790 (4680-7350) | 0.160 |
| Neutrophils (n/ $\mu$ l)           | 3280 (2780-3980)  | 3580 (2700-4490) | 0.343 |
| Albumin (g/dl)                     | 4.24 (4.02-4.59)  | 4.23 (4.10-4.44) | 0.479 |
| Bilirubin (mg/dl)                  | 0.60 (0.44-0.84)  | 0.66 (0.40-1.01) | 0.908 |
| eGFR (ml/min/1.73 m <sup>2</sup> ) | 57.9 (46.3-70.7)  | 66.9 (44.8-82.4) | 0.093 |
| AST (IU/l)                         | 17.5 (14-23)      | 21 (16-26)       | 0.029 |
| ALT (IU/l)                         | 14 (10.5-22.5)    | 18 (14-29)       | 0.021 |
| INR                                | 1.04 (0.98-1.13)  | 1.06 (1.00-1.16) | 0.094 |
| 25-OH-Vitamin D (ng/ml)            | 31.0 (225.5-34.0) | 31.0 (26.7-37.2) | 0.410 |

LT: liver transplantation; BMI: body mass index; HBV: hepatitis B virus; HCV: hepatitis C virus; AH: alcoholic; AI: autoimmune; HCC: hepatocellular carcinoma; DM: diabetes mellitus; HTN: arterial hypertension; MMF: mycophenolate mofetil; IS: immunosuppressive; T: tacrolimus; C: cyclosporine; E: everolimus; A: azathioprine; P: prednisone; #reference blood levels evaluated within 1 month before vaccination for each IS drug were calculated in accordance with Cillo et al.<sup>35</sup>; eGFR: estimated glomerular filtration rate; AST: aspartate aminotransferase; ALT: alanine aminotransferase; INR international normalized ratio. Logistic model estimation parameters: pseudo  $R^2 = 0.363$ ; area under the ROC curve = 0.873; correct classification = 78.6%.

**Table S6.** Association between prevaccination demographic and clinical characteristics of COVID-19-naïve liver transplanted patients (N=126) with regards to the development of a strong positive ( $\geq 100$  U/ml) or negative ( $< 100$  U/ml) anti-SARS-CoV-2 s-RBD antibody titer, as assessed 4 months ( $125 \pm 5$  days) after the second dose of the Pfizer® BTN162b2 vaccine. Categorical parameters are presented as frequencies (%), and the Pearson chi-squared test was used for statistical comparisons. Continuous variables are presented as medians (interquartile range), for serum immunosuppressive drug levels, they are presented as the means ( $\pm$ SE), and the rank-sum test (Mann–Whitney) was used for statistical comparisons. Stepwise regression with a forward approach was used to discriminate independent predictive variables to achieve a strong antibody response after vaccination in a multivariate logistic model analysis.

|                                    | Univariate analysis                              |                                                   |       | Multivariate analysis |             |       |
|------------------------------------|--------------------------------------------------|---------------------------------------------------|-------|-----------------------|-------------|-------|
|                                    | Anti-s RBD IgG $< 100$ U/ml<br>(N = 81)          | Anti-s RBD IgG $\geq 100$ U/ml<br>(N = 45)        | p     | O.R.                  | 95% C.I.    | p     |
| Age at LT (years)                  | 59.8 (54.4-64.6)                                 | 56.9 (49.2-60.9)                                  | 0.010 | 0.946                 | 0.907-0.985 | 0.008 |
| Male gender                        | 57 (70.4)                                        | 31 (68.9)                                         | 0.862 |                       |             |       |
| BMI (kg/m <sup>2</sup> )           | 25.6 (23.4-28.7)                                 | 26.2 (23.7-28.5)                                  | 0.878 |                       |             |       |
| Months between LT and vaccination  | 76.1 (25.9-179)                                  | 149 (66.7-196)                                    | 0.015 |                       |             |       |
| Etiology (HCV, HBV, AH, AI, other) | 16, 14, 41, 6, 4<br>(19.8, 17.3, 50.6, 7.4, 4.9) | 11, 7, 15, 7, 5<br>(24.4, 15.6, 33.3, 15.6, 11.1) | 0.223 |                       |             |       |
| HCC                                | 29 (35.8)                                        | 18 (40.0)                                         | 0.641 |                       |             |       |
| DM                                 | 28 (34.6)                                        | 14 (31.1)                                         | 0.693 |                       |             |       |
| Dyslipidemia                       | 20 (24.7)                                        | 8 (17.8)                                          | 0.371 |                       |             |       |

|                                                 |                             |                     |        |       |             |        |
|-------------------------------------------------|-----------------------------|---------------------|--------|-------|-------------|--------|
| Alcohol consumption >40gr/day                   | 9 (11.1)                    | 1 (2.2)             | 0.077  |       |             |        |
| HTN                                             | 38 (46.9)                   | 16 (35.6)           | 0.217  |       |             |        |
| Presence of esophageal varices                  | 4 (4.9)                     | 2 (4.4)             | 0.901  |       |             |        |
| Presence of ascites                             | 3 (3.7)                     | 1 (2.2)             | 0.649  |       |             |        |
| Immunosuppressive treatment                     |                             |                     |        |       |             |        |
| Tacrolimus                                      | 50 (61.7)                   | 32 (71.1)           | 0.290  |       |             |        |
| Cyclosporine                                    | 20 (24.7)                   | 9 (20.0)            | 0.549  |       |             |        |
| MMF                                             | 46 (56.8)                   | 9 (20.0)            | <0.001 |       |             |        |
| Everolimus                                      | 8 (9.8)                     | 3 (6.7)             | 0.541  |       |             |        |
| Prednisone                                      | 9 (11.1)                    | 3 (6.7)             | 0.415  |       |             |        |
| Double-triple IS including MMF                  | 40 (49.4)                   | 8 (17.8)            | <0.001 |       |             |        |
| (MMF+T; +C; +E; +P; +C+P)                       | 25, 10, 2, 1, 2             | 4, 4, 0, 0, 0       |        |       |             |        |
|                                                 | (30.9, 12.3, 2.5, 1.2, 2.5) | (8.9, 8.9, 0, 0, 0) |        |       |             |        |
| Double-triple IS excluding MMF                  | 8 (9.9)                     | 4 (8.9)             | 0.856  |       |             |        |
| (T+E, T+A, T+P, C+P, T+E+P)                     | 2, 0, 3, 1, 2               | 0, 1, 3, 0, 0       |        |       |             |        |
|                                                 | (2.5, 0, 3.7, 1.2, 2.5)     | (0, 2.2, 6.7, 0, 0) |        |       |             |        |
| Any double IS therapy                           | 44 (54.3)                   | 12 (26.7)           | 0.003  |       |             |        |
| Any triple IS therapy                           | 4 (4.9)                     | 0 (0.0)             | 0.130  |       |             |        |
| Serum IS drug levels or daily dose <sup>#</sup> |                             |                     |        |       |             |        |
| Tacrolimus (ng/ml)                              | 3.69 ±0.40                  | 3.66 ±0.49          | 0.967  |       |             |        |
| Cyclosporine (ng/ml)                            | 10.68 ±2.33                 | 13.3 ±4.85          | 0.743  |       |             |        |
| MMF (g/d)                                       | 0.99 ±0.10                  | 0.27 ±0.08          | <0.001 | 0.363 | 0.214-0.616 | <0.001 |
| Everolimus (ng/ml)                              | 0.51 ±0.20                  | 0.22 ±0.17          | 0.374  |       |             |        |



|                                                  |                  |                  |       |
|--------------------------------------------------|------------------|------------------|-------|
| Prednisone (mg/d)                                | 0.49 ±0.17       | 0.39 ±0.24       | 0.760 |
| IS levels with respect to reference <sup>#</sup> |                  |                  |       |
| Below                                            | 34 (42.0)        | 24 (53.3)        | 0.220 |
| Above                                            | 4 (4.9)          | 1 (2.2)          | 0.454 |
| Hemoglobin (g/dl)                                | 13.0 (12.1-14.4) | 14.1 (13.1-15.0) | 0.011 |
| White blood cells (n/μl)                         | 5600 (4470-6450) | 5980 (4700-7170) | 0.151 |
| Neutrophils (n/μl)                               | 3320 (2540-4090) | 3590 (2860-4490) | 0.248 |
| Albumin (g/dl)                                   | 4.24 (4.03-4.56) | 4.24 (4.10-4.50) | 0.479 |
| Bilirubin (mg/dl)                                | 0.59 (0.43-0.81) | 0.66 (0.43-0.97) | 0.908 |
| eGFR (ml/min/1.73m <sup>2</sup> )                | 58.6 (45.9-71.8) | 70.2 (50.7-81.0) | 0.041 |
| AST (IU/l)                                       | 18 (14-24)       | 18 (16-23)       | 0.454 |
| ALT (IU/l)                                       | 16 (11-25)       | 18 (12-21)       | 0.366 |
| INR                                              | 1.02 (0.98-1.08) | 1.07 (1.01-1.18) | 0.006 |
| 25-OH-Vitamin D (ng/ml)                          | 30.9 (27.2-34.0) | 32.0 (25.0-36.2) | 0.688 |

LT: liver transplantation; BMI: body mass index; HBV: hepatitis B virus; HCV: hepatitis C virus; AH: alcoholic; AI: autoimmune; HCC: hepatocellular carcinoma; DM: diabetes mellitus; HTN: arterial hypertension; MMF: mycophenolate mofetil; IS: immunosuppressive; T: tacrolimus; C: cyclosporine; E: everolimus; A: azathioprine; P: prednisone; <sup>#</sup>reference blood levels evaluated within 1 month before vaccination for each IS drug were calculated in accordance with Cillo et al.<sup>35</sup>; eGFR: estimated glomerular filtration rate; AST: aspartate aminotransferase; ALT: alanine aminotransferase; INR international normalized ratio. Logistic model estimation parameters: pseudo R<sup>2</sup> = 0.170; area under the ROC curve = 0.758; correct classification = 69.8%.

**Table S7.** Association between prevaccination demographic and clinical characteristics of COVID-19 naïve liver transplanted patients (N=123) with regards to the development of a strong positive ( $\geq 100$  U/ml) or negative ( $< 100$  U/ml) anti-SARS-CoV-2 s-RBD antibody response assessed 6 months ( $165 \pm 4$  days) after the second dose of the Pfizer® BTN162b2 vaccine. Categorical parameters are presented as frequencies (%), and the Pearson chi-squared test was used for statistical comparisons. Continuous variables are presented as medians (interquartile range), and for serum immunosuppressive drug levels, they are presented as the means ( $\pm$ SE), and the rank-sum test (Mann–Whitney) was used for statistical comparisons. Stepwise regression with a forward approach was used to discriminate independent predictive variables to achieve a strong antibody response after vaccination in a multivariate logistic model analysis.

|                                    | Univariate analysis                              |                                                  |       | Multivariate analysis |             |       |
|------------------------------------|--------------------------------------------------|--------------------------------------------------|-------|-----------------------|-------------|-------|
|                                    | Anti-s RBD IgG $< 100$ U/ml<br>(N = 87)          | Anti-s RBD IgG $\geq 100$ U/ml<br>(N = 36)       | p     | O.R.                  | 95% C.I.    | p     |
| Age at LT (years)                  | 59.1 (54.0-63.0)                                 | 55.5 (46.0-61.1)                                 | 0.023 | 0.950                 | 0.912-0.989 | 0.012 |
| Male gender                        | 63 (72.4)                                        | 25 (69.4)                                        | 0.740 |                       |             |       |
| BMI ( $\text{kg}/\text{m}^2$ )     | 25.6 (23.2-28.7)                                 | 25.4 (23.7-28.8)                                 | 0.936 |                       |             |       |
| Months between LT and vaccination  | 76.1 (30.9-188.3)                                | 153 (76.2-197)                                   | 0.007 |                       |             |       |
| Etiology (HCV, HBV, AH, AI, other) | 19, 15, 41, 6, 6<br>(21.8, 17.2, 47.1, 6.9, 6.9) | 7, 6, 13, 5, 5<br>(19.4, 16.7, 36.1, 13.9, 13.9) | 0.469 |                       |             |       |
| HCC                                | 34 (39.1)                                        | 13 (36.9)                                        | 0.758 |                       |             |       |

|                                                 |                                                |                                      |        |       |             |        |
|-------------------------------------------------|------------------------------------------------|--------------------------------------|--------|-------|-------------|--------|
| DM                                              | 30 (34.5)                                      | 12 (33.3)                            | 0.903  |       |             |        |
| Dyslipidemia                                    | 19 (21.8)                                      | 20 (22.2)                            | 0.963  |       |             |        |
| Alcohol consumption >40 gr/day                  | 10 (11.5)                                      | 0 (0.0)                              | 0.034  | <0.01 | <0.01-<0.01 | <0.001 |
| HTN                                             | 45 (51.7)                                      | 11(30.6)                             | 0.032  |       |             |        |
| Presence of esophageal varices                  | 4 (4.6)                                        | 2 (5.6)                              | 0.822  |       |             |        |
| Presence of ascites                             | 3 (3.5)                                        | 1 (2.8)                              | 0.849  |       |             |        |
| Immunosuppressive treatment                     |                                                |                                      |        |       |             |        |
| Tacrolimus                                      | 57 (65.5)                                      | 24 (66.7)                            | 0.903  |       |             |        |
| Cyclosporine                                    | 21 (24.1)                                      | 7 (19.4)                             | 0.572  |       |             |        |
| MMF                                             | 46 (52.9)                                      | 6 (16.7)                             | <0.001 |       |             |        |
| Everolimus                                      | 8 (9.2)                                        | 4 (11.1)                             | 0.745  |       |             |        |
| Prednisone                                      | 10 (11.5)                                      | 2 (5.6)                              | 0.313  |       |             |        |
| Double-triple IS including MMF                  | 41 (47.1)                                      | 5 (13.9)                             | <0.001 |       |             |        |
| (MMF+T; +C; +E; +P; +C+P)                       | 24, 12, 2, 1, 2<br>(27.6, 13.8, 2.3, 1.1, 2.3) | 3, 2, 0, 0, 0<br>(8.3, 5.6, 0, 0, 0) |        |       |             |        |
| Double-triple IS excluding MMF                  | 10 (11.5)                                      | 3 (8.3)                              | 0.604  |       |             |        |
| (T+E, T+A, T+P, C+P, T+E+P)                     | 3, 0, 4, 1, 2<br>(3.4, 0, 4.6, 1.1, 2.3)       | 0, 1, 2, 0, 0<br>(0, 2.8, 5.6, 0, 0) |        |       |             |        |
| Any double IS therapy                           | 47 (54.0)                                      | 8 (22.2)                             | 0.001  |       |             |        |
| Any triple IS therapy                           | 4 (4.6)                                        | 0 (0.0)                              | 0.191  |       |             |        |
| Serum IS drug levels or daily dose <sup>#</sup> |                                                |                                      |        |       |             |        |
| Tacrolimus (ng/ml)                              | 4.61 ±0.90                                     | 3.48 ±0.57                           | 0.516  |       |             |        |
| Cyclosporine (ng/ml)                            | 10.5 ±2.65                                     | 10.2 ±4.08                           | 0.877  |       |             |        |

|                                                  |                  |                  |        |       |              |       |
|--------------------------------------------------|------------------|------------------|--------|-------|--------------|-------|
| MMF (g/d)                                        | 0.89 ±0.10       | 0.26 ±0.10       | <0.001 | 0.421 | 0.0228-0.776 | 0.006 |
| Everolimus (ng/ml)                               | 0.53 ±0.19       | 0.37 ±0.19       | 0.838  |       |              |       |
| Prednisone (mg/d)                                | 0.55 ±0.18       | 0.42 ±0.29       | 0.353  |       |              |       |
| IS levels with respect to reference <sup>#</sup> |                  |                  |        |       |              |       |
| Below                                            | 38 (43.7)        | 21 (58.3)        | 0.139  |       |              |       |
| Above                                            | 4 (4.6)          | 1(2.8)           | 0.642  |       |              |       |
| Hemoglobin (g/dl)                                | 13.2 (12.1-14.7) | 14.1 (13.5-15.0) | 0.024  | 1.300 | 1.003-1.678  | 0.047 |
| Leukocytes (n/μl)                                | 5730 (4500-6590) | 5950 (4690-7060) | 0.450  |       |              |       |
| PMN neutrophils (n/μl)                           | 3360 (2780-4180) | 3500 (2700-4540) | 0.689  |       |              |       |
| Albumin (g/dl)                                   | 4.30 (4.10-4.53) | 4.24 (4.10-4.57) | 0.574  |       |              |       |
| Bilirubin (mg/dl)                                | 0.59 (0.40-0.89) | 0.68 (0.45-0.99) | 0.329  |       |              |       |
| eGFR (ml/min/1.73 m <sup>2</sup> )               | 58.6 (45.1-73.1) | 69.8 (53.8-83.2) | 0.022  |       |              |       |
| AST (IU/l)                                       | 18 (14-24)       | 19.5 (17-25)     | 0.089  |       |              |       |
| ALT (IU/l)                                       | 15 (11-22)       | 19 (13-27)       | 0.019  |       |              |       |
| INR                                              | 1.02 (0.97-1.12) | 1.07 (1.03-1.17) | 0.021  |       |              |       |
| 25-OH-Vitamin D (ng/ml)                          | 31.0 (27.2-35.0) | 31.5 (25.0-36.7) | 0.893  |       |              |       |

LT: liver transplantation; BMI: body mass index; HBV: hepatitis B virus; HCV: hepatitis C virus; AH: alcoholic; AI: autoimmune; HCC: hepatocellular carcinoma; DM: diabetes mellitus; HTN: arterial hypertension; MMF: mycophenolate mofetil; IS: immunosuppressive; T: tacrolimus; C: cyclosporine; E: everolimus; A: azathioprine; P: prednisone; <sup>#</sup>reference blood levels evaluated within 1 month before vaccination for each IS drug were calculated in accordance with Cillo et al.<sup>35</sup>; eGFR: estimated glomerular filtration rate; AST: aspartate aminotransferase; ALT: alanine aminotransferase; INR international normalized ratio. Logistic model estimation parameters: pseudo R<sup>2</sup> = 0.212; area under the ROC curve = 0.787; correct classification = 73.2%.
